# Supplementary material for: Effects of acute and chronic exercise on the osmotic stability of erythrocyte membrane of competitive swimmers
Source: PLoS One. 2017 Feb 2;12(2):e0171318. doi: 10.1371/journal.pone.0171318 (PMC5289559; doi:10.1371/journal.pone.0171318)
Supplement: S1 File — Results obtained through the blood analysis of each study volunteer. (XLSX) [file pone.0171318.s001.xlsx]

## Sheet: Total_dados
			Variables	Amax	Amin	H50	1/H50	dX	LDH	CK	t-C	TGC	HDL-C	VLDL-C	LDL-C	UA	Fe	Leu	RBC	HB	Ht	VCM	HCM	CHCM	RDW	Plt
	1st week of training	Pre-training	Voluntary 01	1.02845	0.0206	0.44746	2.23484	0.01019	168	351	163	243	37.9	48.6	76.5	5.24	58.1	7.9	5.78	17.4	54.5	94.4	30.2	32	14.6	229
			Voluntary 02	0.89899	0.00988	0.44437	2.25038	0.01011	169	165	130	127	40.5	12.8	76.7	5	63.7	5.2	4.89	15.4	46.5	95.1	31.5	33.1	14.8	232
			Voluntary 03	0.94323	0.000548392	0.46058	2.17118	0.01598	142	183	205	38	43.6	7.6	88.8	4.46	57.3	6.4	5.03	14.9	46.2	91.7	29.7	32.3	15.3	256
			Voluntary 04	0.88801	0.0273	0.46708	2.14096	0.01468	125	92	152	186	41.7	37.2	73.1	3.85	48.6	6.7	5.34	15.8	48.7	91	29.5	32.4	13.7	264
			Voluntary 05	0.88917	0.00559	0.46049	2.1716	0.01542	144	258	174	115	39.3	23	111.7	4.32	58	5.3	5.46	15.8	48.8	89.3	29	32.4	14.8	199
		Post-traning	Voluntary 01	1.01675	0.00438	0.43591	2.29405	0.01177	164	354	171	243	40	28	103	5.06	67	8.8	5.74	17.4	53	92.4	30.3	32.9	15	247
			Voluntary 02	0.87733	0.01095	0.43947	2.27547	0.01002	172	215	121	95	39	19	63	4.94	54.2	5.6	4.94	15.6	46.3	93.6	31.5	33.6	14.1	228
			Voluntary 03	0.8374	0.00663	0.45875	2.17984	0.01389	151	230	143	190	37	38	68	4.58	45	9	4.98	14.9	45.3	91	29.9	32.9	14.6	262
			Voluntary 04	0.88273	0.00808	0.46826	2.13557	0.02475	134	125	143	123	44.3	16.6	82.1	4.01	37.9	7.1	5.19	15.1	47	90.6	29.2	32.2	13.1	259
			Voluntary 05	0.9211	0.00736	0.45632	2.19144	0.01418	171	312	176	163	41.7	32.6	101.7	4.35	52.6	8.4	5.41	15.8	48.1	89	29.3	32.9	15.4	186
			Variables	Amax	Amin	H50	1/H50	dX	LDH	CK	t-C	TGC	HDL-C	VLDL-C	LDL-C	UA	Fe	Leu	RBC	Hb	Ht	VCM	HCM	CHCM	RDW	Plt
	7th week of regular training	Pre-training	Voluntary 01	1.047	0.01	0.435	2.29885	0.011	188	246	228	116	57.8	23.2	147	6.19	84.4	8.1	5.89	17.8	55.2	93.7	30.3	32.3	15.6	236
			Voluntary 02	0.9288	0.00251	0.44297	2.25749	0.01223	203	183	167	127	57.4	20.6	89	5.42	89.6	5.3	4.9	15.7	46.8	95.6	32.1	33.6	15.5	221
			Voluntary 03	0.9676	0.0075	0.4418	2.26347	0.0146	170	128	222	99	59.5	19.8	142.7	6.56	138.7	5.9	5.45	16.2	49.7	91.2	29.8	32.7	14.3	263
			Voluntary 04	0.92525	0.000666	0.47248	2.11649	0.01231	173	138	192	95	69.4	19	103.6	5.32	73.9	6.7	5.25	15.5	48.1	91.5	29.4	32.2	15.7	238
			Voluntary 05	1.00781	0.01471	0.43156	2.31717	0.02988	180	266	244	119	69.1	23.8	151.1	4.32	96.2	5.3	5.61	16.1	50.2	89.5	28.7	32.1	13.9	191
		Post-traning	Voluntary 01	1.1047	0.0195	0.4317	2.31642	0.01	243	389	238	90	58.7	18	161.3	8.51	67	12.5	6.09	18.3	56.7	93	30	32.3	15.8	270
			Voluntary 02	0.92298	0.01034	0.43605	2.29331	0.01221	251	380	172	147	54.8	29.4	87.8	7.43	91.6	6.1	4.85	15.3	46.5	95.8	31.5	32.9	15.4	220
			Voluntary 03	1.05878	0.03393	0.43945	2.27557	0.01478	221	448	210	65	59.9	13	137.1	8.2	52.8	11.6	5.13	15.3	46.9	91.4	29.8	32.5	14.7	256
			Voluntary 04	0.88005	-0.008	0.46233	2.16296	0.0203	206	275	186	104	46.6	20.8	116.6	6.98	76.6	10.1	5.19	15.2	47	90.7	29.2	32.2	14.7	249
			Voluntary 05	0.96017	0.01299	0.43156	2.31717	0.02988	241	766	245	100	68.5	21.8	154.7	7.37	92.6	7.2	5.6	15.9	50.3	89.8	28.3	31.6	15.6	200
			Variables	Amax	Amin	H50	1/H50	DX	LDH	CK	t-C	TGC	HDL-C	VLDL-C	LDL-C	UA	Fe	Leu	RBC	Hb	Ht	VCM	HCM	CHCM	RDW	Plt
	13th week of regular training	Pre-training	Voluntary 01	1.0519	0.00878	0.44618	2.24125	0.01198	197	210	206	114	50.2	22.8	133	4.96	121.9	7.9	6.03	17.3	54.4	90.1	28.6	31.8	12	252
			Voluntary 02	0.86558	0.01454	0.46762	2.13849	0.00658	231	128	148	91	60.3	18.2	69.5	5.14	78.7	5.2	4.92	15.1	46.5	94.4	30.7	32.5	12	229
			Voluntary 03	0.9196	0.0052	0.4394	2.27583	0.014	194	149	190	158	64.2	31.6	94.2	5.23	74	8.2	5.5	15.7	49	89.1	28.4	31.9	12	273
			Voluntary 04	0.9	0	0.44	2.27273	0.013	211	180	150	120	69	24.6	102	5	120	6	5.5	15	49	85	27	31.5	11	270
			Voluntary 05	0.903	-0.0014	0.4437	2.25378	0.0126	214	220	208	117	50.8	23.4	133.8	5.04	88.9	5.7	5.78	15.7	50.2	87	27.2	31.2	11	226
		Post-traning	Voluntary 01	1.10946	0.00958	0.42995	2.32585	0.01057	201	301	203	88	48.5	17.6	136.9	5.28	67.9	10.7	5.93	17	51.6	86.9	28.7	33	11	265
			Voluntary 02	0.8716	0.02	0.4318	2.31589	0.0065	226	199	157.5	211	57.5	42.2	57.3	5.36	87.4	5	4.96	15.3	46.4	93.7	30.9	33	12	236
			Voluntary 03	0.9578	-0.0016	0.43929	2.2764	0.01659	236	303	195	95	74.5	19	101.5	6.81	92.8	9.8	5.48	16	49	89.3	29.2	32.7	12	318
			Voluntary 04	1.01044	0.01342	0.44809	2.23169	0.01571	178	186	194	123	68.3	24.6	101.1	4.27	102.1	7	5.35	14.8	46.4	86.8	27.8	32	11	262
			Voluntary 05	1.01999	0.00956	0.43268	2.31118	0.01277	197	317	203	98	51.7	19.6	131.7	5.43	66.4	8.8	5.38	14.8	45.8	85.1	27.5	32.3	11	240
			Variables	Amax	Amin	H50	1/H50	dX	LDH	CK	t-C	TGC	HDL-C	VLDL-C	LDL-C	UA	Fe	Leu	RBC	Hb	Ht	VCM	HCM	CHCM	RDW	Plt
	18th week of regular training	Pre-training	Voluntary 01	0.9532	0.0592	0.4073	2.45519	0.0064	545	360	198	117	54.7	23.4	119.9	4.4	106.5	17.3	5.98	18.4	55.6	93	30.8	33.1	15.7	256
			Voluntary 02	0.91573	0.04106	0.40508	2.46865	0.00549	233	228	170	107	58.4	21.4	90.2	5.9	79.7	5.2	4.7	15.3	44.4	94.6	32.6	34.5	14.5	251
			Voluntary 03	0.87409	-0.00035	0.42511	2.35233	0.02225	309	341	176	54	51.8	10.8	113.4	5.4	76	6	4.81	14.7	43.5	90.6	30.6	33.8	14.6	260
			Voluntary 04	0.8996	0.0135	0.445	2.24719	0.0189	203	390	208	68	74.8	13.6	119.6	5.3	124.8	5.9	5.62	15.6	48.5	86.4	27.8	32.2	11	275
			Voluntary 05	1.009	0.0217	0.4095	2.442	0.0174	255	534	228	121	58.9	24.4	144.9	5.5	112.5	6.3	5.42	15.9	48.1	88.8	29.4	33.2	15.1	230
		Post-traning	Voluntary 01	1.07493	0.0017	0.43719	2.28734	0.01273	246	455	251	61	58.5	12.2	180.3	4.8	75	16.9	5.44	17.2	49.9	91.7	31.5	34.4	14.8	288
			Voluntary 02	0.92	0.00619	0.4349	2.29938	0.01789	252	302	183	265	59.2	53	70.8	6	110.4	6	4.71	15.5	44.2	93.8	32.9	35.1	15.1	278
			Voluntary 03	0.9017	0.0127	0.4506	2.21926	0.0127	345	524	195	182	54.1	36.4	104.5	6	99.7	11.9	5	15.2	45.2	90.3	30.4	33.7	15.4	355
			Voluntary 04	0.8803	0.0169	0.4488	2.22816	0.0223	233	496	203	160	71.9	32	99.1	5.1	125.9	7.5	5.03	15.7	45	89.4	31.1	34.8	15.2	303
			Voluntary 05	0.76	0.012	0.444	2.25225	0.014	249	702	221	185	55	37	129	5.7	57.3	8.6	5.16	15.5	45.4	88.1	30	34.1	14.8	238
